# Supplementary material for: Oxygen orders differently under graphene: new superstructures on Ir(111)
Source: Royal Society of Chemistry journal article supplement (doi:10.1039/c5nr04976h), 2015-09-23
Supplement: c5nr04976h1.pdf [file c5nr04976h1.pdf]

## Supporting Information

### Oxygen orders differently under graphene: new superstructures on Ir(111)

A. J. Martínez-Galera<sup>a</sup>, U. A. Schröder<sup>a</sup>, F. Huttmann<sup>a</sup>, W. Jolie<sup>a</sup>, F. Craes<sup>a</sup>, C. Busse<sup>a</sup>, V. Caciuc<sup>b</sup>, N. Atodiresei<sup>b</sup>, S. Blügel<sup>b</sup> and T. Michely<sup>a</sup>

<sup>a</sup> II. Physikalisches Institut, Universität zu Köln, Germany.

<sup>b</sup> Peter Grünberg Institute and Institute for Advanced Simulation, Forschungszentrum Jülich, Germany.

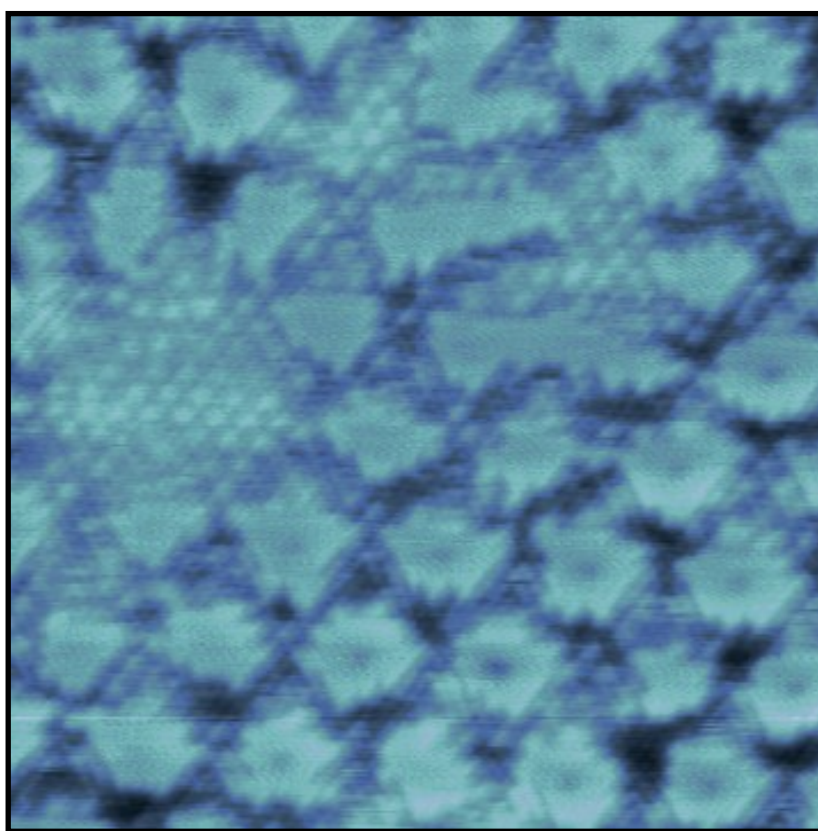

**Fig. S1.** STM topograph of Gr/Ir(111) after oxygen intercalation by exposing to  $1.1 \times 10^3$  L at  $2.4 \times 10^{-6}$  mbar with the sample at 530K. The graphene coverage is about 0.8 ML. Bright areas of triangular shape with the periodicity of the moiré pattern coexist with small patches of the O-(2x2) superstructure. As already discussed in the manuscript, these bright areas are probably not intercalated by oxygen. Such inhomogeneity in the Gr/O/Ir(111) interface could be related to the inhomogeneity of the interaction of the graphene monolayer and the underlying Ir(111) substrate. Tunneling parameters:  $V_s = +0.64$ ,  $I_T = 0.2$  nA; size:  $14 \times 14$  nm<sup>2</sup>.

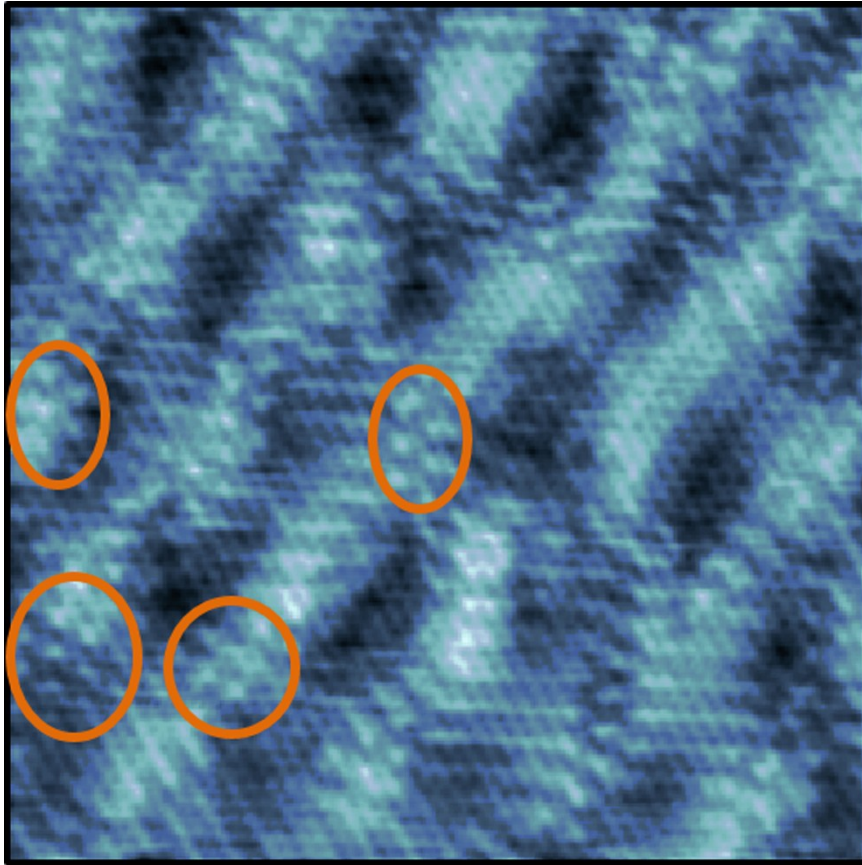

**Fig. S2.** STM topograph of Gr/Ir(111) after oxygen exposure to  $3.4 \times 10^3$  L of molecular oxygen at a partial pressure of  $7.6 \times 10^{-6}$  mbar with the sample at 530K. The graphene coverage is about 0.8 ML. Small patches of O-(2 $\times$ 2) (some of them encircled in orange) and O-(2 $\times$ 1) superstructures coexist. Tunneling parameters:  $V_s = +0.29$ ,  $I_T = 0.3$  nA; size: 10.2 $\times$ 10.2 nm<sup>2</sup>.
